# Supplementary material for: Construction of a SnS2/TiO2 S-scheme heterostructure photocatalyst for highly efficient photocatalytic degradation of tetracycline hydrochloride
Source: Royal Society of Chemistry journal article supplement (doi:10.1039/d4tc00972j), 2024-01-01
Supplement: d4tc00972j1.pdf [file d4tc00972j1.pdf]

**Construction of SnS<sub>2</sub>/TiO<sub>2</sub> S-scheme heterostructure photocatalyst for highly efficient photocatalytic degradation of tetracycline hydrochloride**

Sheng Ding, Wei Gan, Jun Guo, Ruixin Chen, Run Liu, Ziwei Zhao, Jianrou Li, Miao Zhang\*, Zhaoqi Sun\*

School of Materials Science and Engineering, Anhui University, Hefei 230601, Anhui Province, P. R. China

\*Corresponding author

E-mail address: [1397652247@qq.com](mailto:1397652247@qq.com) (Sheng Ding), [b21101003@stu.ahu.edu.cn](mailto:b21101003@stu.ahu.edu.cn) (Wei Gan), [b20101004@stu.ahu.edu.cn](mailto:b20101004@stu.ahu.edu.cn) (Jun Guo), [MS22101019@stu.ahu.edu.cn](mailto:MS22101019@stu.ahu.edu.cn) (Ruixin Chen), [18856138771@163.com](mailto:18856138771@163.com) (Run Liu), [B21301140@stu.ahu.edu.cn](mailto:B21301140@stu.ahu.edu.cn) (Ziwei Zhao), [B21201043@stu.ahu.edu.cn](mailto:B21201043@stu.ahu.edu.cn) (Jianrou Li), [szq@ahu.edu.cn](mailto:szq@ahu.edu.cn) (Zhaoqi Sun), [zhmiao@ahu.edu.cn](mailto:zhmiao@ahu.edu.cn) (Miao Zhang).

1 Analysis of TRPL spectra

2 The decay curves fitted by according to the exponential function [1]:

3 
$$I = y_0 + B_1 e^{-t/\tau_1} + B_2 e^{-t/\tau_2} + B_3 e^{-t/\tau_3} + B_4 e^{-t/\tau_4}$$

4 (S1)

5 The normalized pre-exponential value is calculated by equation [2]:

6 
$$B_i = \frac{B_i}{\sum_{i=1}^n B_i}$$
 (S2)

7 The weighted average lifetime was calculated by the equation [3]:

8 
$$\tau_{ave} = \sum_{i=1}^n B_i \tau_i$$
 (S3)

9 The fitted lifetimes and the corresponding percentages of TiO<sub>2</sub>, and ST-30 are  
10 shown in Table S1.

Fig.S1

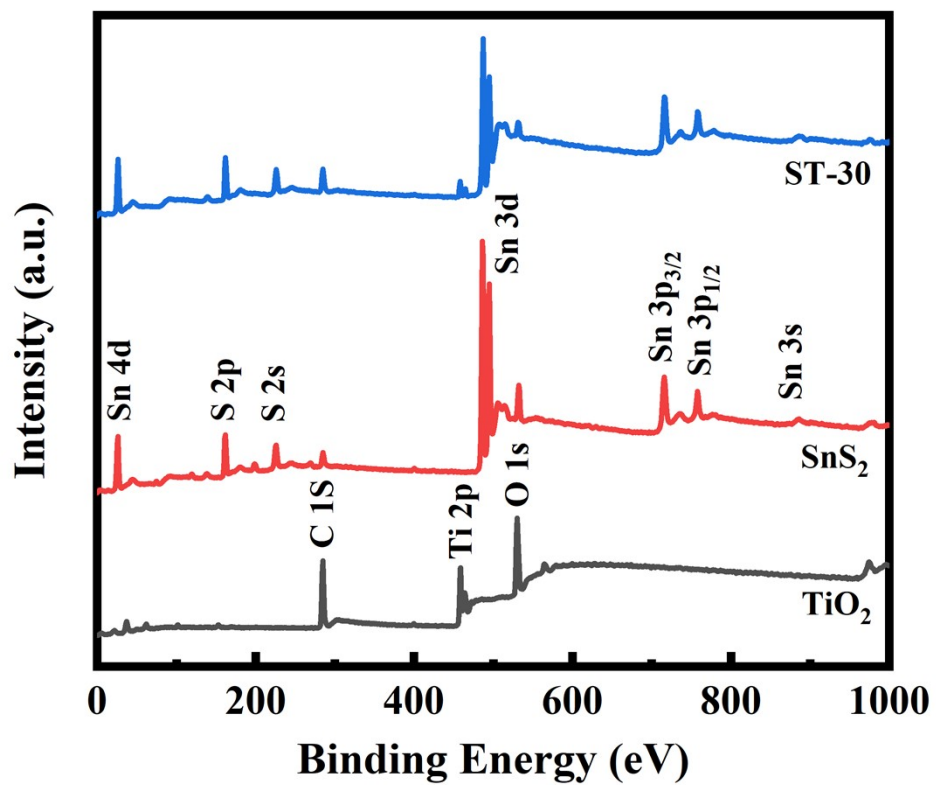

Fig.S1 XPS spectra of TiO<sub>2</sub>, SnS<sub>2</sub> and ST-30.

Fig.S2

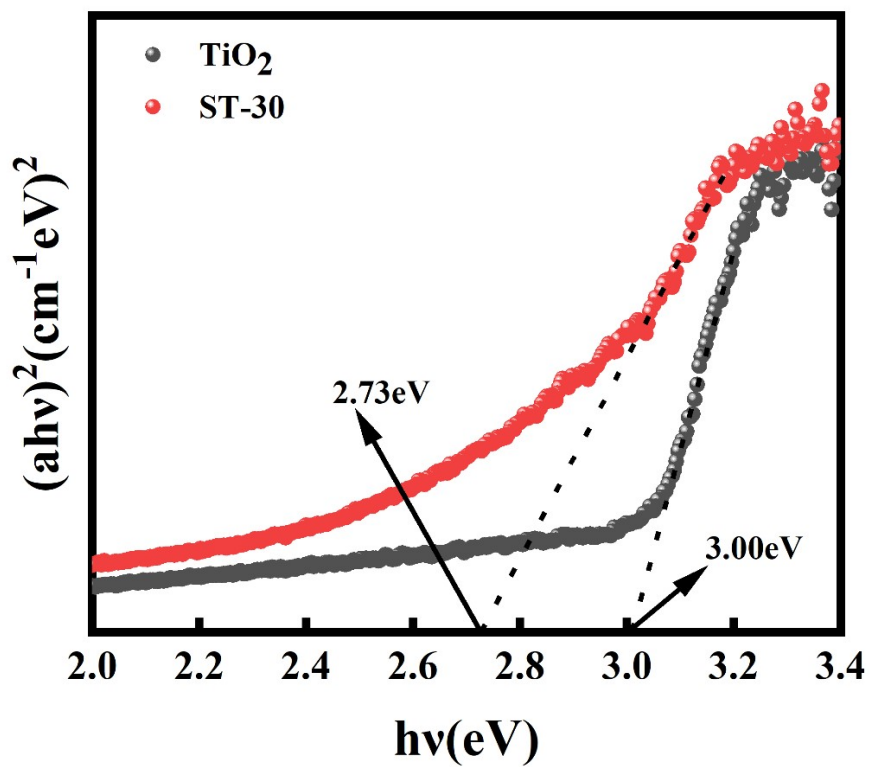

Fig.S2 Absorption edges of  $\text{TiO}_2$  and ST-30.

**Table.S1**

|              | TiO <sub>2</sub> | ST-30    |
|--------------|------------------|----------|
| $\tau_1$     | 6.67E-10         | 5.95E-10 |
| $B_1$        | 1.99E-02         | 1.82E-02 |
| $\tau_2$     | 6.26E-10         | 5.54E-10 |
| $B_2$        | 2.12E-02         | 2.03E-02 |
| $\tau_3$     | 7.62E-09         | 8.37E-09 |
| $B_3$        | 1.86E-04         | 1.38E-04 |
| $\tau_4$     | 1.62E-11         | 1.80E-11 |
| $B_4$        | 4.04             | 3.30     |
| $\tau_{ave}$ | 2.28E-11         | 2.48E-11 |

**Table.S1** The fitted lifetimes and the corresponding percentages of TiO<sub>2</sub> and ST-30.

Fig.S3

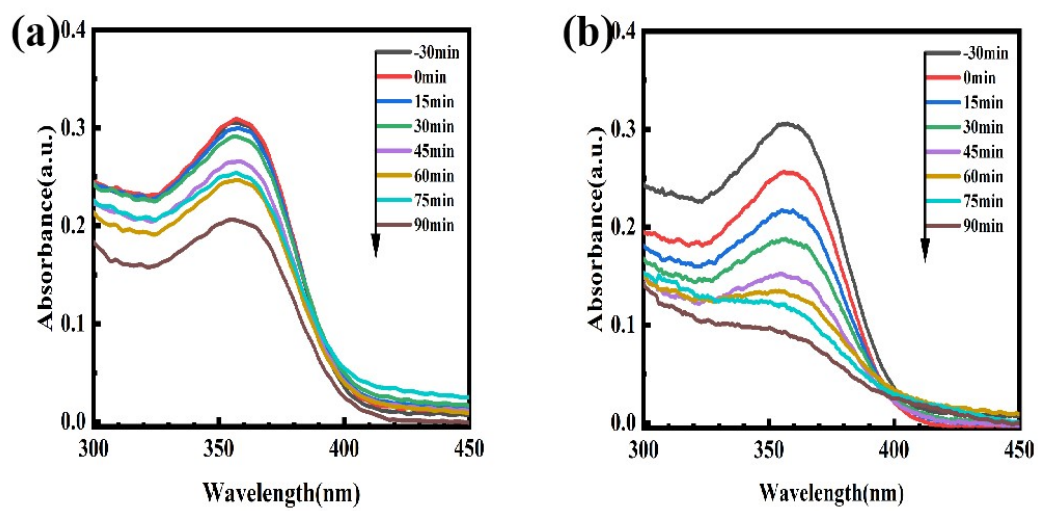

Fig.S3 The degradation curves of (a) TiO<sub>2</sub> and (b) ST-30.

**Fig.S4**

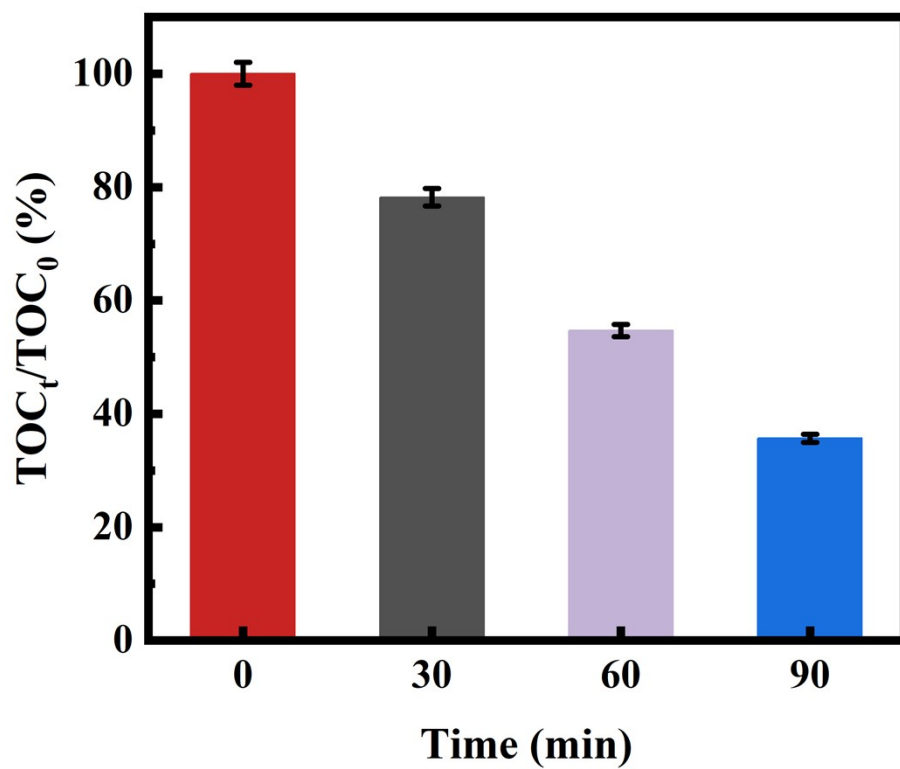

**Fig.S4** Mineralization of TC-HCl by ST-30 at different degradation times.

Fig.S5

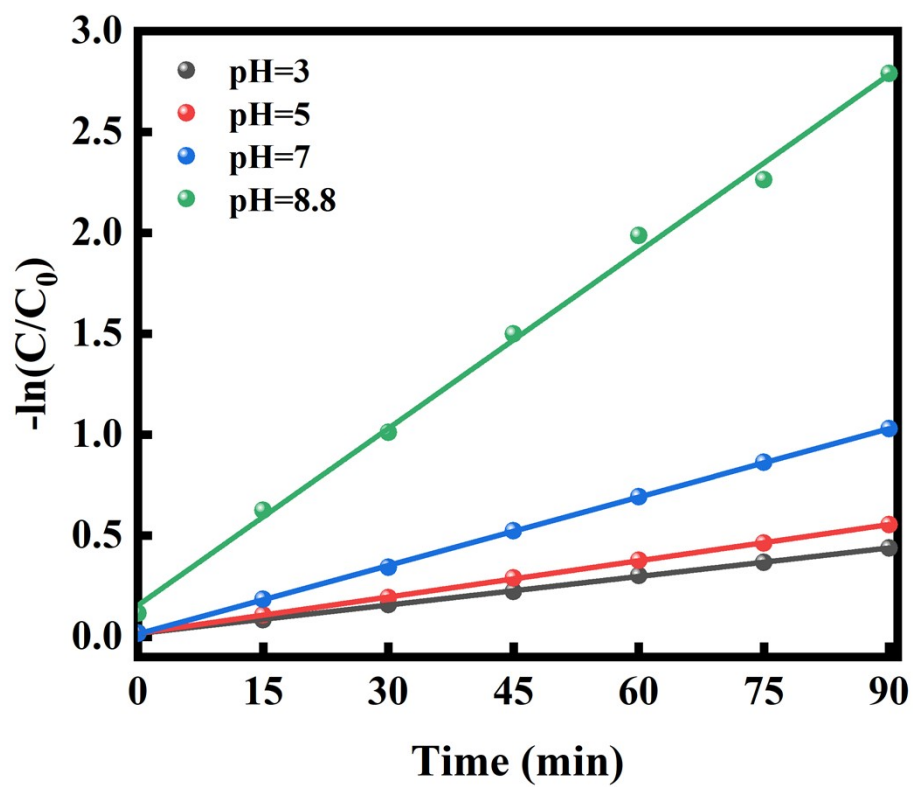

Fig.S5 The kinetic curves of ST-30 under different pH.



**Table.S2** Detailed information of tetracycline hydrochloride and its intermediates

| Compounds | m/z | Formula                                                       | Proposed structure                                                                    |
|-----------|-----|---------------------------------------------------------------|---------------------------------------------------------------------------------------|
| P0        | 445 | C <sub>22</sub> H <sub>24</sub> N <sub>2</sub> O <sub>8</sub> | 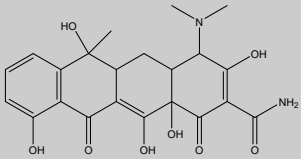   |
| P1        | 461 | C <sub>22</sub> H <sub>24</sub> N <sub>2</sub> O <sub>9</sub> |    |
| P2        | 433 | C <sub>20</sub> H <sub>20</sub> N <sub>2</sub> O <sub>9</sub> |    |
| P3        | 419 | C <sub>19</sub> H <sub>18</sub> N <sub>2</sub> O <sub>9</sub> |    |
| P4        | 371 | C <sub>17</sub> H <sub>25</sub> NO <sub>8</sub>               |   |
| P5        | 279 | C <sub>15</sub> H <sub>18</sub> O <sub>5</sub>                |  |
| P6        | 210 | C <sub>11</sub> H <sub>14</sub> O <sub>4</sub>                |  |
| P7        | 427 | C <sub>22</sub> H <sub>24</sub> N <sub>2</sub> O <sub>7</sub> |  |
| P8        | 324 | C <sub>19</sub> H <sub>16</sub> O <sub>5</sub>                |  |
| P9        | 299 | C <sub>18</sub> H <sub>20</sub> O <sub>4</sub>                |  |

|     |     |                   |  |
|-----|-----|-------------------|--|
| P10 | 268 | $C_{15}H_{24}O_4$ |  |
| P11 | 234 | $C_{15}H_{22}O_2$ |  |
| P12 | 149 | $C_9H_{10}O_2$    |  |

**Fig.S6**

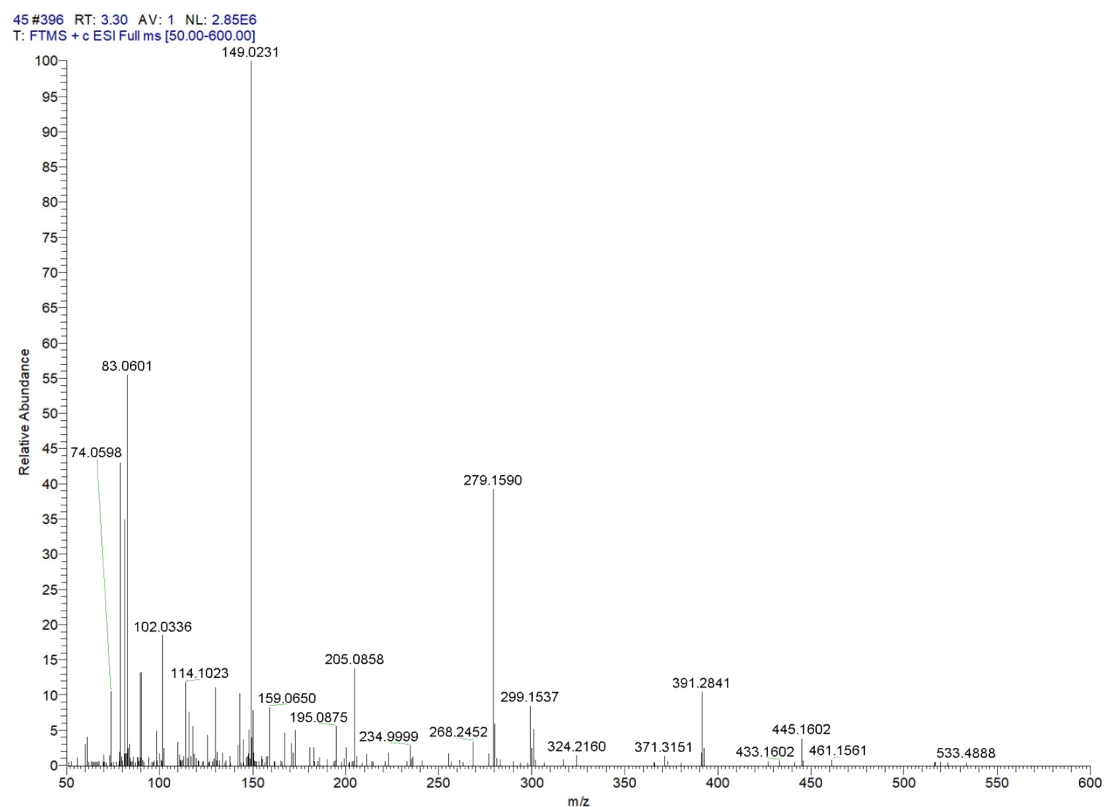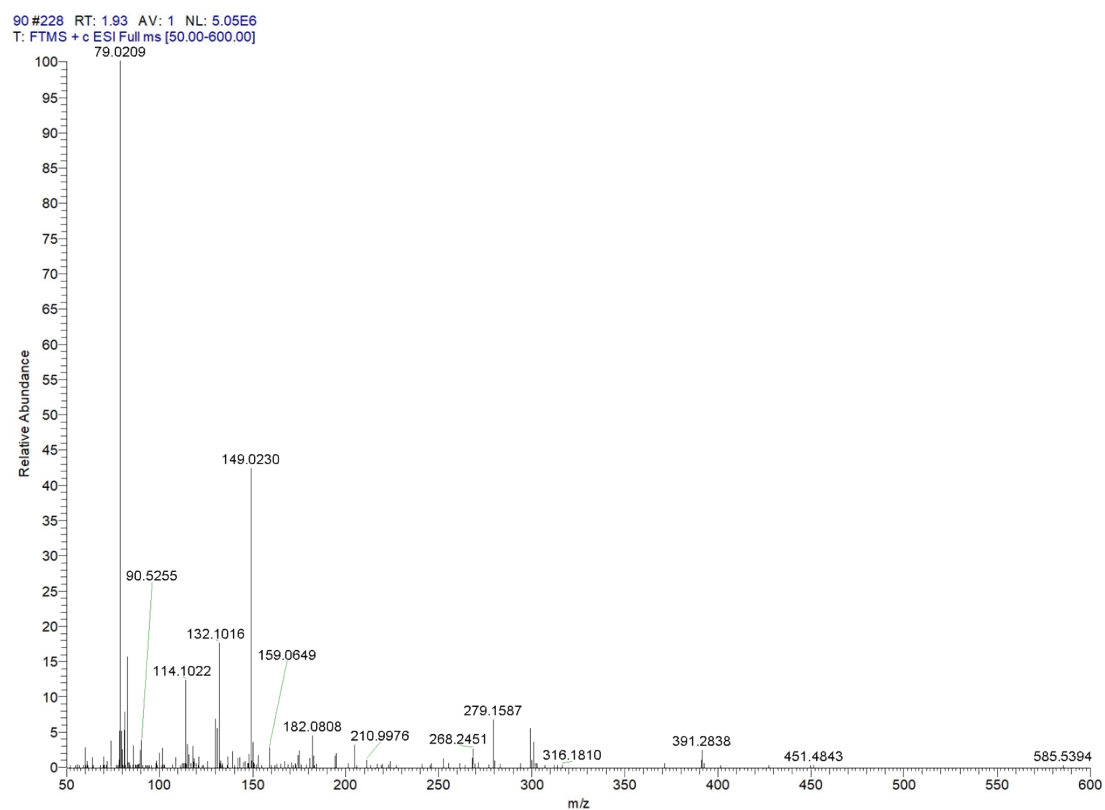

**Fig.S6** MS spectra of the tetracycline hydrochloride at 45min and 90min over ST-30.

**Table.S3** Toxicological values of tetracycline hydrochloride and intermediates predicted by TEST.

| Product | m/z | Fathead minnow LC <sub>50</sub> 96 hr (mg/L) | Daphnia magna LC <sub>50</sub> (48 hr) (mg/L) | Oral rat LD <sub>50</sub> (mg/kg) | Developmental Toxicity | Mutagenicity |
|---------|-----|----------------------------------------------|-----------------------------------------------|-----------------------------------|------------------------|--------------|
| P0      | 445 | 0.90                                         | 8.73                                          | 1068.64                           | 0.86                   | 0.60         |
| P1      | 461 | 7.44                                         | 34.62                                         | 1529.48                           | 0.85                   | 0.66         |
| P2      | 433 | 12.12                                        | 35.94                                         | 2090.36                           | 0.94                   | 0.70         |
| P3      | 419 | 1.65                                         | 18.72                                         | 2129.54                           | 0.91                   | 0.84         |
| P4      | 371 | 33.28                                        | 120.54                                        | 4130.20                           | 0.44                   | 0.69         |
| P5      | 279 | 11.01                                        | 8.02                                          | N/A                               | 0.68                   | 0.45         |
| P6      | 210 | 200.06                                       | 41.05                                         | 777.59                            | 0.66                   | 0.07         |
| P7      | 427 | 0.33                                         | 1.68                                          | 1363.25                           | 0.90                   | 0.64         |
| P8      | 324 | 0.37                                         | 12.18                                         | 2232.11                           | 0.85                   | 0.44         |
| P9      | 299 | 0.21                                         | 12.72                                         | 356.51                            | 0.89                   | 0.48         |
| P10     | 268 | 14.55                                        | 154.92                                        | 314.80                            | 0.75                   | 0.06         |
| P11     | 234 | 2.26                                         | 7.33                                          | 1073.70                           | 0.75                   | 0.20         |
| P12     | 149 | 22.88                                        | 5.03                                          | 1480.12                           | 0.49                   | 0.04         |

Fig.S7

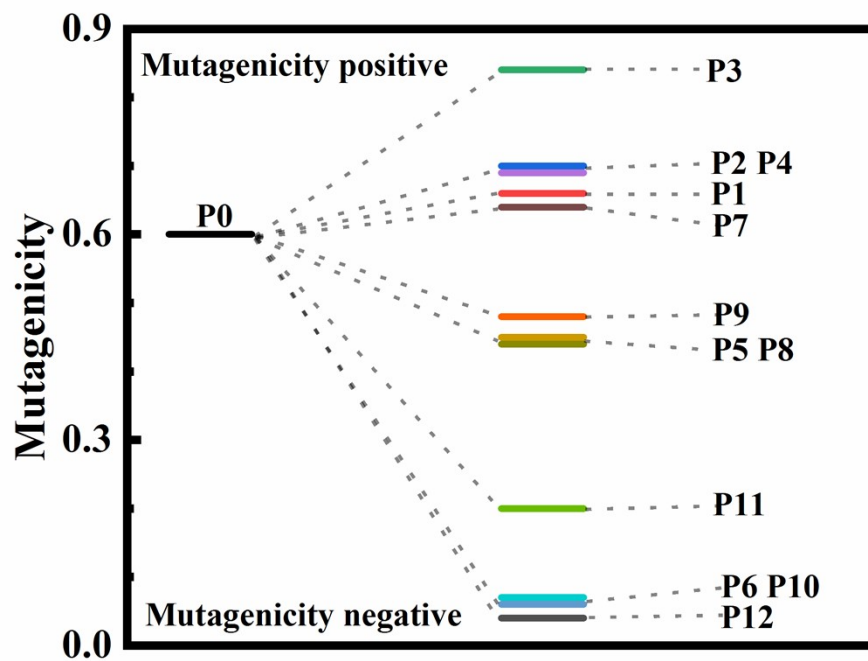

Fig.S7 Toxicity evaluation results of mutagenicity.
